# Supplementary material for: Susceptibility of flexible plastic foodstuffs packaging against Monomorium indicum (Hymenoptera: Formicidae) household ants
Source: PeerJ. 2024 Feb 29;12:e16782. doi: 10.7717/peerj.16782 (PMC10909368; doi:10.7717/peerj.16782)
Supplement: Data S1 [file peerj-12-16782-s006.xlsx]

## Sheet: Damages in packaging 
0.04					0.06						0.02
Date	Packaging	Holes	PWL		Date	Packaging	Holes	PWL		Date	Packaging	Holes	PWL		Type	Guage	Damage	PWL
1	PP1	0	0		1	PP1	0	0	PE	1	PTLD1	6	69.91		PT LD	0.02	6 holes	69.91
1	PT1	0	0		1	PT1	4	64.33		1	PTHD1	2	97.22		PT HD	0.02	1 Big 1 small	97.22
1	PP2	0	0		1	PP2	0	0		1	PP1	7	97.7		PP	0.02	7 holes	97.7
1	PT2	0	0		1	PT2	0	0		1	PTLD1	0	0		PT HD	0.02	4 holes	97.18
1	PP1	1	72.78		1	PP1	0	0		1	PTHD1	4	97.18		PT HD	0.02	1 hole	65.01
1	PT1	0	0		1	PT1	0	0		1	PP1	0	0		PP	0.04	1 big hole	72.78
1	PP2	0	0		1	PP2	0	0		1	PTLD1	0	0		PT	0.07	4 holes	64.33
1	PT2	0	0		1	PT2	0	0		1	PTHD1	1	65.01		PT LD	0.02	7 holes	97.15
1	PP1	0	0		1	PP1	0	0		1	PP1	0	0		PT HD	0.02	10 holes	97.34
1	PT1	0	0		1	PT1	0	0		1	PTLD2	0	0		PP	0.02	2 holes	17.54
1	PP2	0	0		1	PP2	0	0		1	PTHD2	0	0		PP	0.02	1 hole	74.04
1	PT2	0	0		1	PT2	0	0		1	PP2	0	0
2	PP1	0	0		2	PP1	0	0		1	PTLD2	0	0
2	PT1	0	0		2	PT1	0	0		1	PTHD2	0	0
2	PP2	0	0		2	PP2	0	0		1	PP2	0	0
2	PT2	0	0		2	PT2	0	0		1	PTLD2	0	0
2	PP1	0	0		2	PP1	0	0		1	PTHD2	0	0
2	PT1	0	0		2	PT1	0	0		1	PP2	0	0
2	PP2	0	0		2	PP2	0	0		2	PTLD1	0	0
2	PT2	0	0		2	PT2	0	0		2	PTHD1	0	0
2	PP1	0	0		2	PP1	0	0		2	PP1	0	0
2	PT1	0	0		2	PT1	0	0		2	PTLD1	0	0
2	PP2	0	0		2	PP2	0	0		2	PTHD1	0	0
2	PT2	0	0		2	PT2	0	0		2	PP1	0	0
3	PP1	0	0		3	PP1	0	0		2	PTLD1	7	97.15
3	PT1	0	0		3	PT1	0	0		2	PTHD1	10	97.34
3	PP2	0	0		3	PP2	0	0		2	PP1	2	17.54
3	PT2	0	0		3	PT2	0	0		2	PTLD2	0	0
3	PP1	0	0		3	PP1	0	0		2	PTHD2	0	0
3	PT1	0	0		3	PT1	0	0		2	PP2	0	0
3	PP2	0	0		3	PP2	0	0		2	PTLD2	0	0
3	PT2	0	0		3	PT2	0	0		2	PTHD2	0	0
3	PP1	0	0		3	PP1	0	0		2	PP2	0	0
3	PT1	0	0		3	PT1	0	0		2	PTLD2	0	0
3	PP2	0	0		3	PP2	0	0		2	PTHD2	0	0
3	PT2	0	0		3	PT2	0	0		2	PP2	0	0
										3	PTLD1	0	0
										3	PTHD1	0	0
										3	PP1	1	74.04
										3	PTLD1	0	0
										3	PTHD1	0	0
										3	PP1	0	0
										3	PTLD1	0	0
										3	PTHD1	0	0
										3	PP1	0	0
										3	PTLD2	0	0
										3	PTHD2	0	0
										3	PP2	0	0
										3	PTLD2	0	0
										3	PTHD2	0	0
										3	PP2	0	0
										3	PTLD2	0	0
										3	PTHD2	0	0
										3	PP2	0	0

## Sheet: Mandibles and teeth lengths
				Insect	Mandibles	Mandibularlargetooth
				1	395	135
				1	420	109
				1	387	128
	Ant:1			2	172	36
	trogo:2			2	209	32
	Lesser:3			2	200	30
	RFB:4			3	240	79
				3	250	85
				3	233	80
				4	223	88
				4	200	80
				4	181	75
